## Does the Ice Age legacy end in Central Europe? The shrinking distributions of glacial relict crustaceans

Kęstutis Arbačiauskas<sup>1,2</sup>, Carl Smith<sup>3,4</sup>, Asta Audzijonyte<sup>1</sup>

<sup>1</sup>Nature Research Centre, Vilnius, Lithuania

<sup>2</sup>Department of Zoology, Life Science Center, Vilnius University, Vilnius, Lithuania

<sup>3</sup>Department of Ecology and Vertebrate Zoology, University of Łódź, Łódź, Poland

<sup>4</sup>Institute of Vertebrate Biology of the Czech Academy of Sciences, Brno, Czech Republic

### Abstract

1. Glacial relict mysid and amphipod crustaceans are characterised by their affinity for cold and well-oxygenated waters and inability to disperse upstream or by external agents. These crustaceans occur in large and deep lakes of Northern and Central Europe and North America, their distributions shaped by glaciation events. In Europe, along the southern edge of their distribution (Germany, Poland, Lithuania, Belarus), glacial relict crustaceans are threatened by eutrophication and global warming.
2. This study assesses the status of three glacial relict malacostracan species in Lithuania; the amphipods *Monoporeia affinis* and *Pallaseopsis quadrispinosa*, and mysid *Mysis relicta*, and models their abundance as a function of environmental variables and the presence of invasive Ponto-Caspian mysids and amphipods.
3. Our results revealed that *M. affinis* is likely extinct in the country, whereas *M. relicta* was found in only 9 out of 16 locations from which it was previously recorded. The distribution of *P. quadrispinosa* appears to be shrinking.
4. Lake depth and water flowthrough intensity were significantly and positively associated with the relative abundance of relict mysids and amphipods, but no association was found with lake size or the presence of invasive Ponto-Caspian crustaceans.
5. We conclude that urgent action to mitigate the effects of nutrient run-off is needed to improve the status of glacial relict and other species that require good water quality. We also propose the re-introduction of glacial relict species in Lake Drūkšiai, where they went extinct during the operation of the Ignalina nuclear power plant that heated the lake, but where deep-water environmental conditions have improved following the powerplant closure in 2010.

**Key words:** biological invasions, climate change, eutrophication, glacial relicts, *Mysis relicta*, *Monoporeia affinis*, *Pallaseopsis quadrispinosa*, Ponto-Caspian crustaceans

## 1. Introduction

Several species of malacostracan crustaceans, mysids and amphipods in particular, have colonised the inland waters of northern Europe and North America through waterways created by post-glaciation events (Segerstråle, 1957; Holmquist, 1966). Because these species cannot disperse by external agents, their occurrences, confined to the formerly glaciated areas, contributed to the formulation of the idea that past glaciation events might have shaped current species and population distributions (Lovén, 1862; Högbom, 1916). These crustacean species are characterised by a requirement for cold and well-oxygenated water and are often referred to as glacial relicts (Lovén, 1862; Thienemann, 1925; Audzijonyte & Väinölä, 2005). They typically inhabit large, oligotrophic and mesotrophic lakes of North America and Europe. In Europe, glacial relict species are common in Scandinavia, with their southern distribution limit extending to Germany, Poland, Lithuania and Belarus (Gasiūnas, 1959; Köhn & Waterstraat, 1990; Żmudziński, 1990).

In suitable habitats, glacial relict crustaceans can be found in high abundances and play a significant ecological role in pelagic food webs, often comprising most of the diet of commercially valuable inland fish species, such as vendace, whitefish and others (Lasenby, Northcote & Fürst, 1986; Sandlund, Næsje & Jonsson, 1992; Scharf et al., 2008). However, during the 20<sup>th</sup> century and especially during the last few decades, glacial relict crustaceans in the southern part of their distribution have faced increasing anthropogenic pressure, with extinctions reported in many locations. For example, the most sensitive glacial relict species *Monoporeia affinis* (Lindström, 1855), is now considered extinct in Germany (Köhn & Waterstraat, 1990) and Poland (Żmudziński, 1995) but is still known to occur in one lake in Belarus (Vezhnavets V.V., 2021, pers. comm.). The other two glacial relict species found are a mysid, *Mysis relicta* Loven, 1862 (sensu stricto, see Audzijonyte & Väinölä, 2005), and amphipod, *Pallaseopsis quadrispinosa* (G.O. Sars, 1867). These species are often listed in national Red Data books in Central Europe.

Two main factors responsible for the decrease in abundance of glacial relict crustaceans are the eutrophication of lakes and global warming, which reduce the availability of cool oxygen-rich habitats typical of the deeper layers of large lakes. Another potential factor is the introduction or invasions of mysids and amphipods from the Ponto-Caspian region. These Ponto-Caspian malacostracans are among the major invaders of European inland ecosystems (Jażdżewski, 1980; Bij de Vaate et al., 2002) and are known to be highly successful competitors and predators (Dick & Platvoet, 2000; Arbačiauskas & Gumuliauskaitė, 2007). Despite recognition of their negative ecological impacts, the role of the Ponto-Caspian crustaceans in the disappearance of glacial relict species has not been formally tested. In this study, data were compiled from historical records and recent investigations of the distribution and abundance of glacial relict and Ponto-Caspian malacostracan species in 26 Lithuanian lakes and used to map the current distribution of glacial relict species and model the predictors of their abundance.

## 2. Methods

### 2.1. Species

Original investigations of glacial relict species distributions in Lithuania were conducted in the mid-20<sup>th</sup> century and were based on extensive sampling of all lakes potentially suitable for these species (Gasiūnas 1959; Grigelis 1980) (Appendix). The three glacial relict malacostracan species recorded in Lithuania and studied here are the relict mysid *Mysis relicta* and the amphipods *Monoporeia affinis* and *Pallaseopsis*

74 *quadrispinosa*. Historically, *M. affinis* and *M. relicta* have been recorded in 2 and 16 lakes across Lithuania,  
75 respectively, while *P. quadrispinosa* was detected in 46 lakes (Appendix). The introduced non-indigenous  
76 Ponto-Caspian crustacean species considered in this study include the mysid *Paramysis lacustris*  
77 (Czerniavsky, 1882) and amphipods *Pontogammarus robustoides* (G.O. Sars, 1894), *Obesogammarus*  
78 *crassus* (G.O. Sars, 1894) and *Chaetogammarus warpachowskyi* (G.O. Sars, 1894). These species were first  
79 introduced into Lithuanian waters between 1960-1961 and are currently known in over 30 lakes  
80 (Arbačiauskas et al., 2011; Arbačiauskas et al., 2017; this study).

## 81 82 2.2. Sampling, occurrence and relative abundance of malacostracan species

83  
84 To assess recent changes in the occurrence of glacial relict species, 26 out of 46 lakes previously inhabited  
85 by glacial relicts were sampled during 1998-2021 (Table 1, Figure 1). This survey included all lakes known to  
86 have been inhabited by the mysid *M. relicta* and the amphipod *M. affinis*. Sampling for glacial relicts and  
87 Ponto-Caspian malacostracans was performed in depths between 5 to 30 meters using a modified 70 cm  
88 wide epibenthic dredge. The dredge was slowly pulled from a boat for 20-30 meters, targeting the deepest  
89 and shallower parts of the lake in separate trawling events. If *M. relicta* and *M. affinis* were not known to  
90 occur in the lake and sampling was focused on *P. quadrispinosa* only, species occurrence was first assessed  
91 using a hand net in wadable depths late in the autumn season when water temperatures were low, and the  
92 species is known to occur at shallower depths. If this sampling approach did not yield results, trawling was  
93 conducted. Data on the presence of Ponto-Caspian crustaceans in lakes was based on the same sampling  
94 surveys and records from earlier studies (Arbačiauskas et al., 2011; Arbačiauskas et al., 2017).

95  
96 The relative abundance of glacial relict crustaceans in this study was assessed based on the number of  
97 individuals sampled in one trawling event. Three relative abundance categories were used: *abundant*, when  
98 the number of individuals found in at least one trawling event at the site was >100; *moderately abundant*,  
99 with 11 to 100 individuals per trawling event; and *rare*, when no one trawling event yielded more than ten  
100 individuals. On a few occasions, when the presence of *P. quadrispinosa* was detected by hand net sampling,  
101 the presence of  $\leq 5$  or  $> 5$  specimens per 5 min sampling effort was interpreted as indicating a moderate ( $\leq 5$ )  
102 or abundant ( $> 5$ ) population.

## 103 104 2.3. Statistical analysis

105  
106 Five environmental variables were examined as predictors of glacial relict crustacean abundance: lake  
107 surface area, maximum lake depth, average lake depth, lake flowthrough and the presence of Ponto-  
108 Caspian crustaceans. Lake flowthrough measures the proportion of water replaced annually by inflowing  
109 and outflowing rivers and is an important contributor to the oxygenation of deeper water layers.  
110 Consequently, flowthrough was used as a proxy for oxygen conditions in a lake, given that data on oxygen  
111 levels in deeper water layers were unavailable. Environmental variables about lake depth, area and  
112 flowthrough were obtained from the data archive of the Institute of Geology and Geography (Geologijos ir  
113 geografijos institutas, 2002). The full dataset used in the analysis is available in Table 1 and Appendix.

114  
115 To assess which of the variables predicted the relative abundance of glacial relict crustaceans, Generalized  
116 Linear Mixed Models (GLMM), as implemented in libraries *nlme* (Pinheiro et al., 2020) and *glmmTMB* (Brooks  
117 et al., 2017) in the R environment (version 4.2.1; R Core Team, 2022), were fitted. Before model fitting, a data  
118 exploration was undertaken following the protocol described in Ieno & Zuur (2015). The data were examined

119 for outliers in the response and explanatory variables, homogeneity and zero inflation in the response variable,  
120 collinearity between explanatory variables and the nature of relationships between the response and  
121 explanatory variables. Sample variograms failed to show spatial dependency in the data, and an  
122 autocorrelation function plot failed to show temporal autocorrelation. Separate analyses were performed for  
123 *M. relicta* and *P. quadrispinosa* relative abundance. Because sampling among years was highly uneven, year  
124 was treated as a category with two levels: samples from the 20<sup>th</sup> century (Period 1) or 21<sup>st</sup> century (Period 2).  
125 Maximum and average lake depths were highly correlated, so only average depth was included in models.  
126

127 The relative abundance of relict crustaceans was modelled using a Generalized Linear Mixed Model (GLMM)  
128 with Conway-Maxwell Poisson distribution; this distribution, rather than a Poisson, was employed to  
129 accommodate underdispersion in the response variable. The initial full model was defined as:

$$130 \quad Relict_{ij} \sim CMP(\mu_{ij}, \nu_{ij}),$$

$$131 \quad E(Relict_{ij}) = \mu_{ij}$$

$$132 \quad var(Relict_{ij}) = \mu_{ij} \times \nu_{ij}$$

$$133 \quad \text{square-root}(\mu_{ij}) = \eta_{ij}$$

$$134 \quad \eta_{ij} = \beta_1 + \beta_2 \times Period_{ij} + \beta_3 \times Flow_{ij} + \beta_4 \times AvDepth_{ij} + \beta_5 \times LakeArea_{ij} + \beta_6 \times PC_{ij} + Lake_j$$

$$135 \quad Lake_j \sim N(0, \sigma^2_{Lake})$$

136 where  $Relict_{ij}$  is the relative abundance of relict crustaceans (amphipod or mysid) in sample  $i$  from lake  $j$ , which  
137 was assumed to follow a Conway-Maxwell-Poisson distribution with an expected abundance ( $E$ ) in each sample  
138 with mean  $\mu_{ij}$  and variance  $\mu_{ij} \times \nu_{ij}$  (where  $\nu$  is a dispersion parameter) and a square-root link function. The  
139 fixed effects were the period of sample collection ( $Period_{ij}$ ), lake flowthrough ( $Flow_{ij}$ ), average lake depth  
140 ( $AvDepth_{ij}$ ), lake area ( $LakeArea_{ij}$ ) and presence of Ponto-Caspian crustaceans (mysids or amphipods) in the  
141 lake ( $PC_{ij}$ ) at the time of sampling, while  $\beta_1$  to  $\beta_6$  are model coefficients to be estimated. To accommodate the  
142 fact that lakes were sampled repeatedly and the abundance of relict crustaceans differed among lakes, the  
143 random intercept  $Lake_j$  was included in models to introduce a correlation structure between observations for  
144 different samples from the same lake, with variance  $\sigma^2_{Lake}$  distributed normally and with a mean of zero  
145 (categorical, 26 levels). We could not perform a time series or survival analysis on this dataset due to a limited  
146 number of sampling years per lake. The optimal fixed structure of a model for each dataset was identified with  
147 a backward selection procedure using AIC ( $\Delta AIC \leq 2$ ) (Akaike, 1973). All datasets and scripts used in these  
148 analyses are available on the GitHub repository <https://github.com/astaudzi/relictCrustaceans>.  
149

### 150 3. Results

151  
152 Studies conducted in the 1950s reported the presence of glacial relict malacostracans in 46 Lithuanian lakes  
153 (Figure 1, Appendix). More recent sampling performed in 26 of these lakes, including all lakes with earlier  
154 records of *M. affinis* and *M. relicta*, revealed that *M. affinis* is likely to be extinct in Lithuania, as it has not  
155 been found in either of the two lakes in which it was earlier known to occur (Dusia and Ilgai, #16 and #20 in  
156 the Appendix, asterisks in Figure 1). In the mid-20<sup>th</sup> century, *M. relicta* was recorded in 16 lakes, whereas  
157 recent data suggest that the species now occurs only in 9 lakes (Table 1, Figure 1). The amphipod *P.*  
158 *quadrispinosa* was known to occur in all 26 studied lakes, but sampling failed to detect this species in 7 of  
159 the studied lakes. Ten out of 26 investigated lakes currently contain invasive Ponto-Caspian crustaceans,  
160 and in two of these lakes, extinctions of glacial relicts were observed (Table 1, Figure 1).  
161

162 Backward model selection showed that for both relict mysid and amphipod datasets, the best-fitting model  
163 included three environmental variables: average depth, flowthrough and time period (20<sup>th</sup> or 21<sup>st</sup> century).

164 Removing the presence of Ponto-Caspian crustaceans from models improved model fit (AIC of 331 versus  
165 180 for amphipods, and AIC of 167 versus 126 for mysids), showing that the presence of Ponto-Caspian  
166 crustaceans did not explain the abundance of glacial relicts.

167  
168 The final models showed relict crustacean relative abundance to be positively associated with lake  
169 flowthrough (for amphipods  $P = 0.009$ ; for mysids  $P = 0.028$ ) and average lake depth (amphipods and  
170 mysids  $P < 0.001$ ) (Table 2, Figures 2, 3). For each species, there was also a significant association with time  
171 period, and a reduction in relative abundance associated with the 21<sup>st</sup> century compared to the 20<sup>th</sup>  
172 century (amphipods  $P = 0.007$ ; mysids  $P = 0.004$ ). Fixed effects explained about 20% of the variance in relict  
173 crustacean relative abundance in both models (Table 2). In contrast, a lake effect, included as a random  
174 term in the models, explained approximately 8-10% of the variance in both models (Table 2: the difference  
175 between conditional  $R^2$ , defined by fixed effects, and marginal  $R^2$ , defined by both fixed and random  
176 effects).

#### 177 178 4. Discussion

179  
180 Investigations of glacial relict malacostracan crustaceans in the inland waters of Lithuania started in the  
181 middle of the 20<sup>th</sup> century (Gasiūnas, 1959), and historical records of their occurrence were summarised by  
182 Grigelis (1980) and Grigelis & Arbačiauskas (1996, 1997). The latest published data on the abundance and  
183 ecology of glacial relict crustaceans in Lithuania are available in Audzijonyte (1999). The study presented  
184 here provides up-to-date information on the status of these Red Data book species. Our results show a  
185 likely extinction of the glacial relict amphipod *M. affinis* in Lithuania and a rapid decrease in the number of  
186 lakes inhabited by *M. relict*a and *P. quadrispinosa*. The amphipod *M. affinis* was originally found in only two  
187 locations in Lithuania and is now also considered extinct in German and Polish waters (Köhn & Waterstraat,  
188 1990; Żmudziński, 1995). Our data also suggests that from the 16 lakes inhabited by *M. relict*a in the 1950s,  
189 the species is now either absent or very rare in nearly half of them, i.e. in 7 lakes. Even the least sensitive  
190 species, *P. quadrispinosa*, was not found in seven lakes where it had previously been encountered.

191  
192 The key contributing factor to the deteriorating conditions of glacial relict crustaceans is the eutrophication  
193 of lakes, driven mainly by agricultural run-off. Eutrophication leads to deteriorating oxygen conditions in  
194 deeper and cooler water layers, effectively reducing habitats suitable for glacial relict species. This effect is  
195 supported by our analysis, with water flowthrough and lake depth significant predictors of both relict mysid  
196 and amphipod relative abundance. Both variables are associated with the presence of cool, oxygenated  
197 water conditions. An additional possibility is that elevated water temperatures may contribute to  
198 worsening conditions for glacial relict crustaceans. However, no data are available on changes in water  
199 temperatures in the studied lakes over recent decades or how such changes might affect the summer  
200 stratification and seasonal mixing of lake water layers.

201  
202 Despite initial predictions, no evidence was detected for a contribution by the presence of Ponto-Caspian  
203 crustaceans to the decreased abundance of native glacial relict crustaceans. On the one hand, this may not  
204 be surprising because glacial relicts typically occur in deep waters, while the Ponto-Caspian species occur in  
205 more shallow areas. However, if oxygen conditions in deeper waters deteriorate, relict crustaceans often  
206 occupy more shallow depths, where they may encounter competition or predation from invasive  
207 crustaceans. Despite this risk, no adverse effects of predation on glacial relicts have been seen in Lithuanian  
208 waters, and there were several lakes in which both glacial relict and Ponto-Caspian species co-existed (e.g.

209 lakes #3, 4, 7, 16, 19, 26 for *M. relicta* in Table 1) or where glacial relicts went extinct despite there being no  
210 Ponto-Caspian crustaceans (#5, 15, 17, 18). Similarly, predatory interactions between an invasive American  
211 amphipod *Gammarus tigrinus* and the native glacial relict mysid *Mysis salemaai* (Audzijonyte & Väinölä  
212 2005; former *Mysis relicta*) appears not to be a threat to the native mysid in Northern Ireland (Bailey et al.,  
213 2006).

214  
215 While the legacy of the Ice Age has diminished in Central Europe, Lithuanian waters still support a rich  
216 glacial faunal heritage. Nine lakes in Lithuania still harbour the relict mysid *M. relicta*, compared to just  
217 three known localities in Germany (Scharf & Koschel, 2004), up to three localities in Poland (Żmudziński,  
218 1990) and only one in Belarus (Vezhnavecs V.V., 2021, pers. comm.). This glacial heritage in Lithuania  
219 warrants preservation and improvement, where possible. The decrease in eutrophication and consequent  
220 increase in lake water quality has been shown to markedly improve environmental conditions for the relict  
221 mysids, resulting in its population increase (Scharf & Koschel, 2004).

222  
223 One notable example of glacial relict extinction was in the largest Lithuanian lake, Lake Drūkšiai (#9, Table  
224 1). Since 1984 this lake has served as a cooling reservoir for the Ignalina nuclear power plant, with the lake  
225 temperature increasing by nearly 2°C, water eutrophication level increasing due to improper wastewater  
226 discharge from the town that served the nuclear power plant, and oxygen concentrations decreasing in the  
227 lake profundal zone (Kesminas & Paškauskas, 2014; Vezhnavecs & Škute, 2014). Consequently, our sampling  
228 in 2003 showed that all glacial relict species were also likely to be extinct in this lake (Table 1). However,  
229 the nuclear power plant was decommissioned in 2010, and environmental conditions in the lake are now  
230 improving, as is shown by the improved population status of two cold water species – vendace (*Coregonus*  
231 *albula*) and smelt (*Osmerus eperlanus*) (Kesminas & Steponėnas, 2014; Kesminas V., 2022, pers. comm.).  
232 Given that glacial relict species cannot disperse, we would recommend attempting a re-introduction of *M.*  
233 *relicta* and *P. quadrispinosa* from nearby lakes, as suggested previously (Kesminas et al., 2014). A good  
234 source for translocations could be nearby Lakes Lūšiai or Aisetas, where the population status of glacial  
235 mysids and amphipods is currently good. If successful, such re-introductions could increase the probability  
236 of these endangered species surviving in Lithuania. Re-introductions into other historical habitats after an  
237 improvement in water quality should also be considered. Nevertheless, the most urgent measures to  
238 ensure the survival of the Red Data book crustaceans and other aquatic species that rely on clear and  
239 oxygenated aquatic habitats, is an urgent reduction of municipal and especially agricultural run-off into  
240 rivers and lakes.

241

## 242 **Acknowledgements**

243

244 This study has received funding from European Regional Development Fund (Project No. 01.2.2-LMT-K-718-  
245 02-0006) under grant agreement with the Research Council of Lithuania (LMTLT).

246

247 Kęstutis Arbačiauskas <https://orcid.org/0000-0001-8688-2291>

248 Carl Smith <https://orcid.org/0000-0003-3285-0379>

249 Asta Audzijonyte <https://orcid.org/0000-0002-9919-9376>

250

## 251 **References**

252

- 253 Akaike, H. (1973) Information Theory and an Extension of the Maximum Likelihood Principle. In: B.N. Petrov  
254 & F. Csaki (Eds.) *Proceedings of the 2<sup>nd</sup> International Symposium on Information Theory*. Budapest,  
255 Akademiai Kiado, pp. 267-281.
- 256 Arbačiauskas, K. & Gumuliauskaitė, S. (2007). Invasion of the Baltic Sea basin by the Ponto-Caspian  
257 amphipod *Pontogammarus robustoides* and its ecological impact. In: F. Gherardi (Ed.) *Biological Invaders*  
258 *in inland waters: profiles, distribution and threats*. Springer, Dordrecht, The Netherlands, pp. 463–477.  
259 [https://doi.org/10.1007/978-1-4020-6029-8\\_25](https://doi.org/10.1007/978-1-4020-6029-8_25)
- 260 Arbačiauskas, K., Šidagytė, E., Šniaukštaitė, V. & Lesutienė, J. (2017). Range expansion of Ponto-Caspian  
261 peracaridan crustaceans in the Baltic Sea basin and its aftermath: lessons from Lithuania. *Aquatic*  
262 *Ecosystem Health & Management*, 20(4), 393-401. <https://doi.org/10.1080/14634988.2017.1328229>
- 263 Arbačiauskas, K., Višinskienė, G., Smilgevičienė, S. & Rakauskas, V. (2011). Non-indigenous  
264 macroinvertebrate species in Lithuanian fresh waters, Part 1: Distributions, dispersal and future.  
265 *Knowledge and Management of Aquatic Ecosystems*, 402, 12. <https://doi.org/10.1051/kmae/2011075>
- 266 Audzijonytė, A. (1999). Aukštesniųjų ledynmečio reliktinių vėžiagyvių gausumo ir populiacijos struktūros  
267 tyrimai Lūšių, Šakarvų, Akmenos ir Verniejaus ežeruose. *Ekologija*, 2, 36-41.
- 268 Audzijonytė, A. & Väinölä, R. (2005). Diversity and distributions of circumpolar fresh- and brakish-water  
269 *Mysis* (Crustacea: Mysida): description of *M. relicta* Loven, 1862, *M. salemaai* n. sp., *M. segerstralei* n.sp.  
270 and *M. diluviana* n. sp., based on molecular and morphological characters. *Hydrobiologia*, 544, 89-141.  
271 <https://doi.org/10.1007/s10750-004-8337-7>
- 272 Bailey, R.J.E., Dick, J.T.A., Elwood, R.W. & MacNeil, C. (2006). Predatory interactions between the invasive  
273 amphipod *Gammarus tigrinus* and the native opossum shrimp *Mysis relicta*. *Journal of the North*  
274 *American Benthological Society*, 25(2), 393-405. [https://doi.org/10.1899/0887-](https://doi.org/10.1899/0887-3593(2006)25[393:PIBTIA]2.0.CO;2)  
275 [3593\(2006\)25\[393:PIBTIA\]2.0.CO;2](https://doi.org/10.1899/0887-3593(2006)25[393:PIBTIA]2.0.CO;2)
- 276 Bij de Vaate, A., Jazdzewski, K., Ketelaars, H.A.M., Gollasch, S. & Van der Velde, G. (2002). Geographical  
277 patterns in range extension of Ponto-Caspian macroinvertebrate species in Europe. *Canadian Journal of*  
278 *Fisheries and Aquatic Sciences*, 59, 1159–1174. <https://doi.org/10.1139/f02-098>
- 279 Brooks, M.E., Kristensen, K., van Benthem, K.J., Magnusson, A., Berg, C.W., Nielsen, A. et al. (2017).  
280 glmmTMB Balances Speed and Flexibility Among Packages for Zero-inflated Generalized Linear Mixed  
281 Modeling. *The R Journal*, 9(2), 378-400. [https://journal.r-project.org/archive/2017/RJ-2017-](https://journal.r-project.org/archive/2017/RJ-2017-066/index.html)  
282 [066/index.html](https://journal.r-project.org/archive/2017/RJ-2017-066/index.html)
- 283 Dick, J.T.A. & Platvoet, D. (2000). Invading predatory crustacean *Dikerogammarus villosus* eliminates both  
284 native and exotic species. *Proceedings of the Royal Society B*, 267, 977–983.  
285 <https://doi.org/10.1098/rspb.2000.1099>
- 286 Gasiūnas, I. (1959). Lietuvos ežerai, kuriuose gyvena reliktiniai vėžiagyviai. *Mūsų girios*, 3, 35-37.
- 287 Geologijos ir geografijos institutas. (2002). *Lietuvos ežerų klasifikacija pagal jų gamtines savybes*. Ataskaita.  
288 Vilnius.
- 289 Grigelis, A. (1980). Bentosiniai ledynmečio reliktiniai vėžiagyviai, rasti Lietuvos TSR ledyninės kilmės  
290 ežeruose 1952-1978 m. *Lietuvos TSR MA darbai, C serija*, 2(90), 69-78.
- 291 Grigelis, A. & Arbačiauskas, K. (1996). Ledynmečio reliktiniai vėžiagyviai Baltijos aukštumų ežeruose.  
292 *Žuvininkystė Lietuvoje*, 2, 21-34.
- 293 Grigelis, A. & Arbačiauskas, K. (1997). Ledynmečio reliktinių vėžiagyvių būklė Lietuvoje ir antropogeninė  
294 tarša. *Ekologija*, 2, 25-27.
- 295 Högbom, A.G. (1916). Über die arktischen Elemente in der aralokaspischen Fauna, ein tiergeographisches  
296 Problem. *Bulletin of the Geological Institution of the University of Upsala*, 14, 241-260.

- 297 Holmquist, C. (1966). Die sogenannten marin-glazialen Relikte nach neueren Gesichtspunkten. *Archiv für*  
298 *Hydrobiologie*, 62, 285-326.
- 299 Ieno, E.N. & Zuur, A.F. (2015). *A Beginner's Guide to Data Exploration and Visualisation with R*. Highland  
300 Statistics, Newburgh.
- 301 Jazdzewski, K. (1980). Range extensions of some gammaridean species in European inland waters caused by  
302 human activity. *Crustaceana*, Suppl. 6, 84–107. <https://www.jstor.org/stable/25027516>
- 303 Kesminas, V. & Paškauskas, R. (2014). 1. Physical and geographical survey of Lake Drūkšiai. *Zoology and*  
304 *Ecology*, 24(2), 84-86. <https://doi.org/10.1080/21658005.2014.925236>
- 305 Kesminas, V. & Steponėnas, A. (2014). 8. Fish community. *Zoology and Ecology*, 24(2), 135-153.  
306 <https://doi.org/10.1080/21658005.2014.925243>
- 307 Kesminas, V., Vezhnavets, V.V., Kasperovičienė, J., Baichorov, V.M., Steponėnas, A., Rakauskas, V. et al.  
308 (2014). Recommendations on re-introduction of crustaceans and fish, use of fish stocks, and  
309 improvement of the state of Lake Drūkšiai. *Zoology and Ecology*, 24(2), 185-186.  
310 <https://doi.org/10.1080/21658005.2014.925245>
- 311 Köhn, J. & Waterstraat, A. (1990). Recent distribution of glacial relict Malacostraca in the lakes of  
312 Mecklenburg. *Annales Zoologici Fennici*, 27, 237-240. <https://www.jstor.org/stable/23736039>
- 313 Lasenby, D.C., Northcote, T.G. & Fürst, M. (1986). Theory, practice, and effects of *Mysis relicta*  
314 introductions to North America and Scandinavian lakes. *Canadian Journal of Fisheries and Aquatic*  
315 *Sciences*, 43: 1277-1284. <https://doi.org/10.1139/F86-158>
- 316 Lovén, S. (1862). Om nagra i Vettern och Venern funna crustaceer. *Ofversigt af Kungliga Vetenskaps-*  
317 *Akademiens Forhandlingar*, 6, 285–314.
- 318 R Core Team. (2022). *R: A language and environment for statistical computing, Version 4.2.1*. R Foundation  
319 for Statistical Computing, Vienna, Austria. URL <https://www.R-project.org/>
- 320 Pinheiro, J., Bates, D., DebRoy, S. & Sarkar, D., R Core Team. (2020). *nlme: Linear and Nonlinear Mixed*  
321 *Effects Models. R package version 3.1-145*. <https://CRAN.R-project.org/package=nlme>
- 322 Sandlund, O.T., Næsje, T.F. & Jonsson B. (1992). Ontogenetic changes in habitat use by whitefish,  
323 *Coregonus lavaretus*. *Environmental Biology of Fishes*, 33, 341-349.  
324 <https://doi.org/10.1007/BF00010945>
- 325 Segerstråle, S.G. (1957). On immigration of the glacial relicts of Northern Europe, with remarks on their  
326 prehistory. *Societas Scientiarum Fennica, Commentationes Biologicae*, 16(16), 1-117.
- 327 Scharf, J., Krappe, M., Koschel, R. & Waterstraat, A. (2008). Feeding of European cisco (*Coregonus albula*  
328 and *C. lucinensis*) on the glacial relict crustacean *Mysis relicta* in Lake Breiter Luzin (Germany).  
329 *Limnologica*, 38, 147–158. <https://doi.org/10.1016/j.limno.2007.12.001>
- 330 Thienemann, A. (1925). *Mysis relicta*. Funfte Mitteilung der Untersuchungen über die Beziehungen  
331 zwischen dem Sauerstoffgehalt des Wassers und der Zusammensetzung der Fauna norddeutscher Seen.  
332 *Zeitschrift für Morphologie und Ökologie der Tiere*, 3, 389–440.
- 333 Vezhnavets, V.V. & Škute, A. (2014). 2. The main characteristics of the habitat. *Zoology and Ecology*, 24(2),  
334 87-91. <https://doi.org/10.1080/21658005.2014.925237>
- 335 Żmudziński, L. (1990). Past and recent occurrence of Malacostraca glacial relicts in Polish lakes. *Annales*  
336 *Zoologici Fennici*, 27, 227-230. <https://www.jstor.org/stable/23736035>
- 337 Żmudziński, L. (1995). Retreat of *Pallasiola quadrispinosa* (G. O. Sars) and *Monoporeia affinis* (Lindström)  
338 from the Polish lakes. *Polskie Archiwum Hydrobiologii*, 42(4), 401-407.



**Table 1.** Occurrence and relative abundance of glacial relict crustaceans in Lithuanian lakes investigated during 1998-2021. Relict species *Mysis relicta* (M.r.), *Monoporeia affinis* (M.a.) and *Pallaseopsis quadrispinosa* (P.q.), year of sampling and relative abundance in brackets are provided, abundance classes: absent (0), present (1), moderately abundant (2), abundant (3). Ponto-Caspian species (P.C.s.) occurring in a lake: *Paramysis lacustris* (P.l.) *Pontogammarus robustoides* (P.r.), *Obesogammarus crassus* (O.c.) and *Chaetogammarus warpachowskyi* (C.w.).

| No | Lake             | M.r.                                      | M.a.                  | P.r.                                      | P.C.s.                    |
|----|------------------|-------------------------------------------|-----------------------|-------------------------------------------|---------------------------|
| 1  | Aisetas          | 1999 (3), 2003 (3),<br>2021 (3)           |                       | 1999 (2), 2003 (2),<br>2021 (2)           |                           |
| 2  | Akmena           |                                           |                       | 1998 (0)                                  |                           |
| 3  | Asalnai          | 2003 (2)                                  |                       | 2003 (2)                                  | P.l., P.r.                |
| 4  | Asveja           | 1999 (3), 2003 (3),<br>2021 (3)           |                       | 1999 (3), 2003 (3),<br>2021 (3)           | P.r., O.c.                |
| 5  | Baltieji Lakajai | 1999 (0)                                  |                       | 1999 (3), 2003 (2),                       |                           |
| 6  | Baluošai         | 2003 (3), 2021 (3)                        |                       | 2003 (2), 2021 (2)                        |                           |
| 7  | Baluošas         | 1999 (3), 2003 (1),<br>2021 (1)           |                       | 1999 (3), 2003 (3),<br>2021 (1)           | P.l.                      |
| 8  | Čičirys          |                                           |                       | 2003 (1)                                  |                           |
| 9  | Drūkšiai         | 2003 (0)                                  |                       | 2003 (0)                                  | P.l.                      |
| 10 | Dusia            | 1999 (1), 2000 (1),<br>2002 (1), 2005 (0) | 1999 (0),<br>2000 (0) | 1999 (3), 2000 (2),<br>2002 (1), 2005 (0) | P.l., P.r., O.c.,<br>C.w. |
| 11 | Galstas          |                                           |                       | 2014 (2)                                  | P.r.                      |
| 12 | Galvė            |                                           |                       | 2020 (1)                                  |                           |
| 13 | Ilgai            |                                           | 1999 (0)              | 1999 (3)                                  |                           |
| 14 | Luodis           |                                           |                       | 1995 (1), 2008 (0)                        |                           |
| 15 | Luokesai         | 2003 (0)                                  |                       | 2003 (2)                                  |                           |
| 16 | Lūšiai           | 2003 (3), 2013 (3),<br>2021 (2)           |                       | 2003 (3), 2013 (3),<br>2021 (3)           | P.l., P.r., C.w.          |
| 17 | Peršokšnai       | 2003 (2), 2021 (0)                        |                       | 2003 (1), 2021 (0)                        |                           |
| 18 | Siesartis        | 2003 (0)                                  |                       | 2003 (0)                                  |                           |
| 19 | Šakarvai         | 1998 (3), 2003 (3)                        |                       | 1998 (3), 2003 (3)                        | P.l., P.r., C.w.          |
| 20 | Šventas          |                                           |                       | 2018 (0)                                  |                           |
| 21 | Tauragnas        |                                           |                       | 1998 (3), 2003 (3)                        |                           |
| 22 | Ūkojas           | 1999 (3), 2003 (0)                        |                       | 1999 (2), 2003 (1)                        |                           |
| 23 | Vencavas         |                                           |                       | 1999 (3)                                  |                           |
| 24 | Vištytis         |                                           |                       | 2014 (2)                                  | P.r.                      |
| 25 | Zarasas          | 2003 (3), 2021 (3)                        |                       | 2003 (3), 2021 (3)                        |                           |
| 26 | Žeimenys         | 2003 (3)                                  |                       | 2003 (2)                                  | P.l., P.r., C.w.          |

**Table 2.** Parameters of the final Conway-Maxwell Poisson generalized linear models for relict mysid *Mysis relicta* and relict amphipod *Pallaseopsis quadrispinosa* relative abundance analyses. Mar/Con R<sup>2</sup> – marginal and conditional R<sup>2</sup> values;  $\sigma^2$  is the mean random effect variance for each model;  $\tau_{00 \text{ Lake}}$  is the model between-subject variance, indicating how much different levels of the random term ‘Lake’ differ from each other; ICC is the intra-class correlation coefficient, which is a measure of the degree of correlation within groups; N indicates the number of levels in the random effect ‘Lake’.

| Coefficient                   | Estimate         | CI (95%)      | P-value | Estimate      | CI (95%)      | P-value |
|-------------------------------|------------------|---------------|---------|---------------|---------------|---------|
|                               | <b>Amphipods</b> |               |         | <b>Mysids</b> |               |         |
| <b>Fixed effects</b>          |                  |               |         |               |               |         |
| Intercept                     | 1.51             | 1.39 – 1.62   | <0.001  | 1.54          | 1.42 – 1.66   | <0.001  |
| Time period <sub>(C21)</sub>  | -0.17            | -0.30 – -0.05 | 0.007   | -0.21         | -0.35 – -0.07 | 0.004   |
| logFlow                       | 0.11             | 0.03 – 0.20   | 0.009   | 0.12          | 0.01 – 0.23   | 0.028   |
| Ave Depth                     | 0.22             | 0.14 – 0.31   | <0.001  | 0.19          | 0.08 – 0.29   | <0.001  |
| <b>Random effects</b>         |                  |               |         |               |               |         |
| $\sigma^2$                    | 0.20             |               |         | 0.18          |               |         |
| $\tau_{00 \text{ Lake}}$      | 0.02             |               |         | 0.03          |               |         |
| ICC                           | 0.10             |               |         | 0.12          |               |         |
| N <sub>Lake</sub>             | 26               |               |         | 16            |               |         |
| <b>Other model statistics</b> |                  |               |         |               |               |         |
| Observations                  | 71               |               |         | 49            |               |         |
| Mar/Con R <sup>2</sup>        | 0.20 / 0.28      |               |         | 0.19 / 0.29   |               |         |

## Figure legends

**Figure 1.** Location of Lithuanian lakes with historical records of glacial relict crustaceans indicating the recent occurrence of these crustaceans. The amphipod *Monoporeia affinis* (asterisks) and the mysid *Mysis relicta* (circles) occurred in 2 and 16 lakes, respectively. Recently, *M. affinis* became extinct from both localities and *M. relicta* survived in 9 localities (above). The amphipod *Pallaseopsis quadrispinosa* occurred in 46 lakes. Recently it was not recorded in 7 lakes, was found to be present in 19 lakes, while 20 localities remained unchecked (below).

**Fig. 2.** Results of the Conway-Maxwell Poisson GLMM analysis showing relationships between the relative abundance of relict mysids *Mysis relicta* against lake flowthrough and average lake depth during the 20<sup>th</sup> Century (period 1, blue) and 21<sup>st</sup> Century (period 2, red). Model predictions and 95% confidence intervals are shown with lines and shaded areas, raw data are shown with dots.

**Fig. 3.** Results of the Conway-Maxwell Poisson GLMM analysis showing relationships between relative abundance of relict amphipods *Pallaseopsis quadrispinosa* against lake flowthrough and average lake depth during the 20<sup>th</sup> Century (period 1, blue) and 21<sup>st</sup> Century (period 2, red). Model predictions and 95% confidence intervals are shown with lines and shaded areas, raw data are shown with dots.

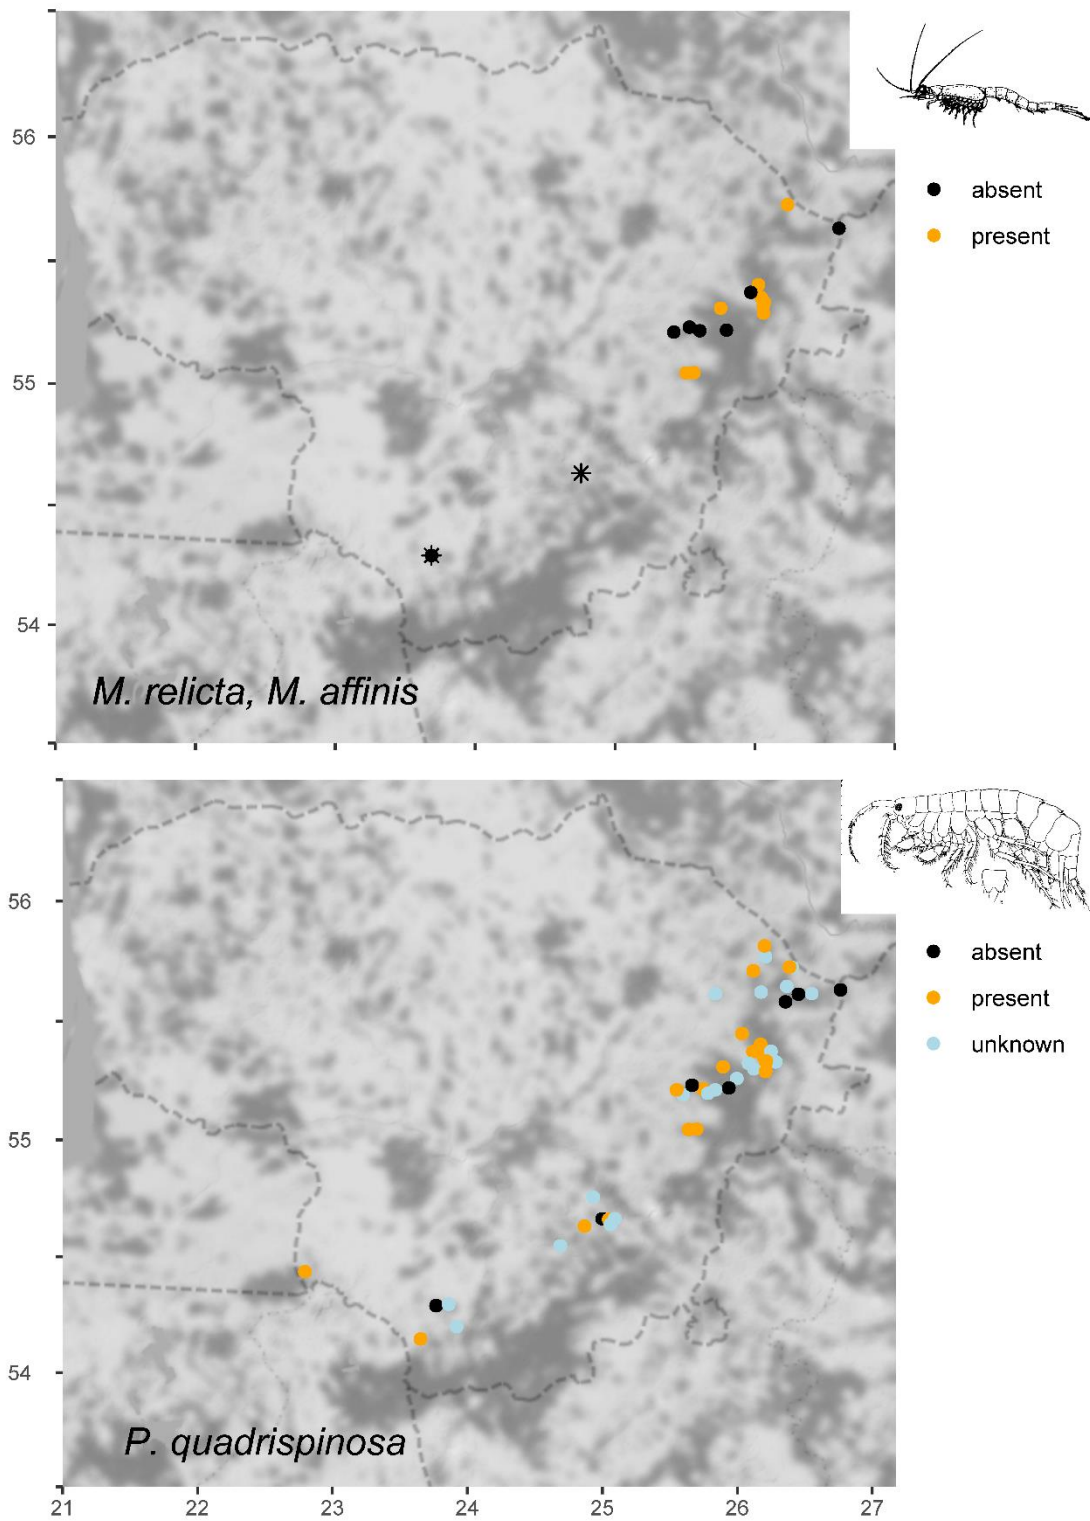

Figure 1.

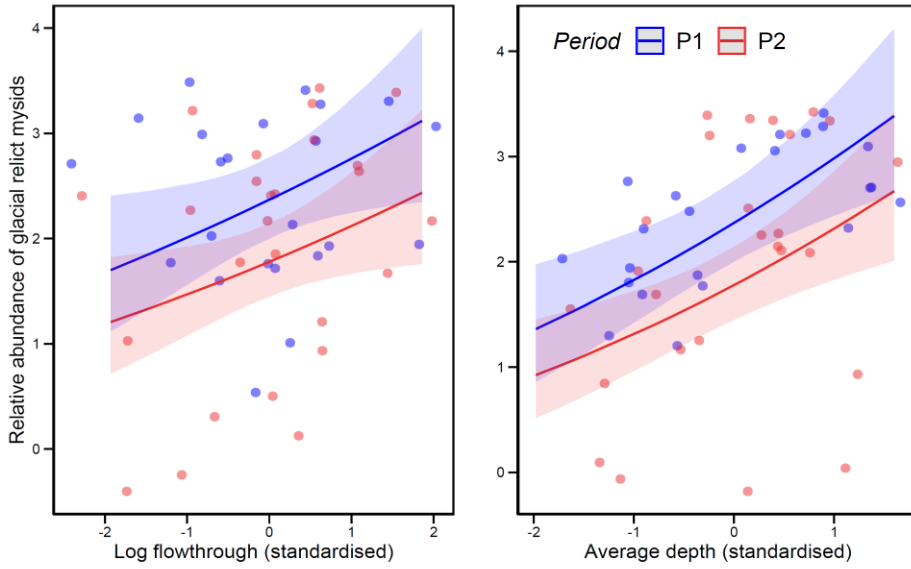

Figure 2.

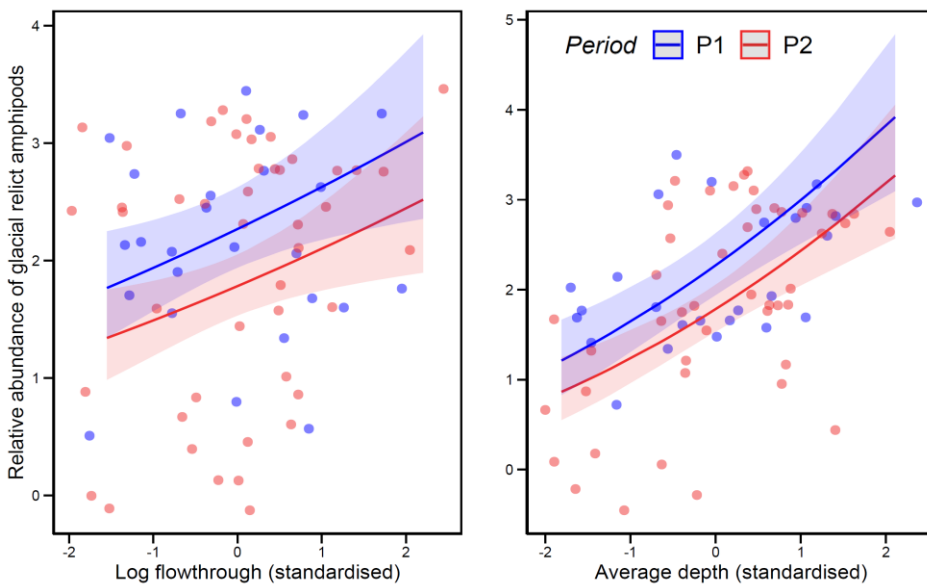

Figure 3.

**Appendix.** Occurrence of glacial relict malacostracan crustaceans, *Mysis relicta* (M.r.), *Monoporeia affinis* (M.a.) and *Pallaseopsis quadrispinosa* (P.q.) in Lithuanian lakes reported by Grigelis (1980) and Grigelis & Arbačiauskas (1996). Limnological characteristics: S – lake area in hectares, H<sub>max</sub> and H<sub>ave</sub> – maximum and average depth in meters, Flow – percentage of annual water exchange. Population status (Grigelis, 1980): +++ - abundant, ++ - moderately abundant, + - rare.

| No | Lake                | M.r. | M.a. | P.r. | S, ha  | H <sub>max</sub> , m | H <sub>ave</sub> , m | Flow, % | Lat.  | Lon.  |
|----|---------------------|------|------|------|--------|----------------------|----------------------|---------|-------|-------|
| 1  | Aisetas             | +    |      | +    | 501.2  | 40                   | 10.4                 | 123     | 55.31 | 25.75 |
| 2  | Akmena              |      |      | +    | 276.5  | 30.2                 | 11.2                 | 8       | 54.66 | 24.88 |
| 3  | Alaušas             |      |      | ++   | 1054   | 42                   | 11.9                 | 11      | 55.62 | 25.70 |
| 4  | Antalieptės marios† |      |      | +    | 1572.3 | 46                   | 7.2                  | 102     | 55.62 | 26.03 |
| 5  | Asalnai             | +    |      | +    | 334.6  | 33                   | 10                   | 430     | 55.35 | 26.04 |
| 6  | Asveja              | +    |      | ++   | 1015.1 | 50.2                 | 14.9                 | 46      | 55.04 | 25.51 |
| 7  | Avilys              |      |      | +    | 1258   | 13.5                 | 3                    | 51      | 55.77 | 26.06 |
| 8  | Baltas              |      |      | +    | 64.6   | 15.4                 | 6                    | 41      | 55.26 | 25.85 |
| 9  | Baltieji Lakajai    | +    |      | ++   | 700.8  | 45                   | 13.6                 | 40      | 55.22 | 25.60 |
| 10 | Baluošai            | +    |      | +    | 251.6  | 37.5                 | 12.5                 | 52      | 55.04 | 25.56 |
| 11 | Baluošas            | +    |      | +    | 427.3  | 33.1                 | 10.7                 | 103     | 55.40 | 26.02 |
| 12 | Bebrusai            |      |      | +    | 374.6  | 24                   | 7                    | 79      | 55.19 | 25.47 |
| 13 | Čičirys             |      |      | +    | 699.6  | 39.2                 | 7.7                  | 27      | 55.81 | 26.05 |
| 14 | Dringis             |      |      | +    | 721.4  | 24                   | 8.4                  | 72      | 55.37 | 26.10 |
| 15 | Drūkšiai            | +    |      | +    | 4480   | 33.3                 | 8.2                  | 29      | 55.63 | 26.60 |
| 16 | Dusia               | +++  | +    | ++   | 2334   | 32.6                 | 15.4                 | 6       | 54.29 | 23.69 |
| 17 | Galstas             |      |      | +    | 386    | 50.1                 | 14.1                 | 13      | 54.14 | 23.57 |
| 18 | Galvė               |      |      | ++   | 371.2  | 46.8                 | 13.6                 | 20      | 54.66 | 24.93 |
| 19 | Gavys               |      |      | ++   | 123.5  | 39                   | 10.1                 | 12      | 55.33 | 26.13 |
| 20 | Ilgai               |      | +    | +    | 143.8  | 35.5                 | 11.7                 | 20      | 54.63 | 24.76 |
| 21 | Juodieji Lakajai    |      |      | ++   | 495.5  | 32.8                 | 8.2                  | 153     | 55.20 | 25.65 |
| 22 | Luka (Bernardinų)   |      |      | +    | 75.7   | 20                   | 10.1                 | 100     | 54.64 | 24.94 |
| 23 | Luodis              |      |      | +    | 1302.2 | 18.4                 | 6.71                 | 35      | 55.58 | 26.20 |
| 24 | Luokesai            | +    |      | +    | 104.2  | 43.8                 | 14.4                 | 12      | 55.21 | 25.42 |
| 25 | Lūšiai              | +++  |      | ++   | 391.4  | 37                   | 13.9                 | 249     | 55.33 | 26.07 |
| 26 | Metelys             |      |      | +    | 1286   | 15                   | 6.8                  | 12      | 54.30 | 23.78 |
| 27 | Peršokšnai          | +    |      | +    | 215.7  | 32.5                 | 7.9                  | 119     | 55.22 | 25.80 |
| 28 | Rašia               |      |      | +    | 185.2  | 25                   | 8.1                  | 33      | 55.21 | 25.70 |
| 29 | Siesartis           | +    |      | +    | 532    | 37.8                 | 11.3                 | 60      | 55.23 | 25.53 |
| 30 | Šakarvai            | +    |      | +++  | 79.5   | 40                   | 16.5                 | 1070    | 55.32 | 26.06 |
| 31 | Samavas             |      |      | +    | 536.7  | 12.7                 | 5.9                  | 63      | 55.64 | 26.21 |
| 32 | Seirijis            |      |      | +    | 501.2  | 19.2                 | 7.95                 | 29      | 54.20 | 23.84 |
| 33 | Skaistis            |      |      | +    | 307.9  | 32                   | 9.8                  | 85      | 54.66 | 24.97 |
| 34 | Smalvas             |      |      | +    | 327.5  | 26.9                 | 8.2                  | 34      | 55.62 | 26.39 |
| 35 | Šventas             |      |      | ++   | 442    | 18.2                 | 6.4                  | 14      | 55.61 | 26.30 |

|    |            |    |  |    |       |      |      |     |       |       |
|----|------------|----|--|----|-------|------|------|-----|-------|-------|
| 36 | Tauragnas  |    |  | +  | 512.7 | 60.5 | 18.7 | 22  | 55.45 | 25.89 |
| 37 | Ūkojas     | +  |  | +  | 210   | 30.5 | 11.3 | 155 | 55.37 | 25.97 |
| 38 | Ūsiai      |    |  | +  | 256.6 | 23.3 | 7.8  | 46  | 55.30 | 25.98 |
| 39 | Vencavas   |    |  | ++ | 226.8 | 48.4 | 13.9 | 10  | 55.71 | 25.97 |
| 40 | Verniejus  |    |  | +  | 102.4 | 50   | 12.5 | 21  | 54.55 | 24.58 |
| 41 | Vievis     |    |  | +  | 291.8 | 33   | 12.9 | 18  | 54.76 | 24.82 |
| 42 | Vištytis   |    |  | +  | 1787  | 47   | 12.8 | 10  | 54.44 | 22.74 |
| 43 | Zarasaitis |    |  | +  | 61    | NA   | NA   | NA  | 55.72 | 26.25 |
| 44 | Zarasas    | ++ |  | ++ | 326.6 | 36.6 | 11.5 | 124 | 55.73 | 26.23 |
| 45 | Žeimenys   | +  |  | +  | 454.6 | 23.5 | 6.9  | 698 | 55.29 | 26.06 |
| 46 | Žiezdras   |    |  | ++ | 57.1  | 36   | 11.3 | 72  | 55.32 | 25.94 |

† Antalieptės marios is a water reservoir which contains Lake Dusetas where *P. quadrispinosa* occurred.
